# Supplementary material
Source: Royal Society of Chemistry journal article supplement (doi:10.1039/d6cp01288d)
Supplement: d6cp01288d1.pdf [file d6cp01288d1.pdf]

## Supporting Information for

### Membrane-Mediated Allosteric Modulation of the $\kappa$ -Opioid Receptor by Nitrous Oxide

Pu Jiang<sup>1,2</sup>, Cong Zhang<sup>1,2</sup>, Penghui Li<sup>1</sup>, Yibo Wang<sup>1\*</sup>, Xiaohui Wang<sup>1,2\*</sup>

<sup>1</sup>Interdisciplinary Laboratory for Frontier Chemistry, Changchun Institute of Applied Chemistry, Chinese Academy of Sciences, Changchun, 130022, China

<sup>2</sup>School of Applied Chemistry and Engineering, University of Science and Technology of China, Hefei, 230026, China

\*Corresponding authors

E-mail: yibo.wang@ciac.ac.cn; xiaohui.wang@ciac.ac.cn

## Table of Contents

|                                                                                                                                                               |    |
|---------------------------------------------------------------------------------------------------------------------------------------------------------------|----|
| <b>Table S1.</b> Composition of the MD simulation systems.....                                                                                                | S3 |
| <b>Figure S1.</b> Convergence analysis of the PMF during metadynamics.....                                                                                    | S4 |
| <b>Figure S2.</b> Histogram overlap analysis for umbrella sampling of Dyn binding to KOR.....                                                                 | S5 |
| <b>Figure S3.</b> Validation of the reaction coordinate and convergence of the PMF for metadynamics simulations of the KOR inactive-to-active transition..... | S6 |
| <b>Figure S4.</b> Backbone RMSDs of KOR in the active-KOR/Dyn and active-KOR/Dyn/N <sub>2</sub> O_0.6 systems.....                                            | S7 |

**Table S1.** Molecular composition of the MD simulation systems.

| Simulation system                   | N <sub>2</sub> O Number / Concentration       | Size                       | Cholesterol / POPC | Na <sup>+</sup> / Cl <sup>-</sup> | Water |
|-------------------------------------|-----------------------------------------------|----------------------------|--------------------|-----------------------------------|-------|
| N <sub>2</sub> O_0                  | 0 / 0 mol·L <sup>-1</sup>                     | 10 *10 *12 nm <sup>3</sup> | 144 / 216          | 68 / 68                           | 25490 |
| N <sub>2</sub> O_0.3                | 220 / 0.30 mol·L <sup>-1</sup>                | 10 *10 *12 nm <sup>3</sup> | 144 / 216          | 66 / 66                           | 24646 |
| N <sub>2</sub> O_0.6                | 440 / 0.60 mol·L <sup>-1</sup>                | 10 *10 *12 nm <sup>3</sup> | 144 / 216          | 64 / 64                           | 23655 |
| N <sub>2</sub> O_1.2                | 880 / 1.20 mol·L <sup>-1</sup>                | 10 *10 *12 nm <sup>3</sup> | 144 / 216          | 61 / 61                           | 23336 |
| N <sub>2</sub> O_single             | 1 / 1.36*10 <sup>-3</sup> mol·L <sup>-1</sup> | 10 *10 *12 nm <sup>3</sup> | 144 / 216          | 69 / 69                           | 25262 |
| active-KOR/Dyn                      | 0 / 0 mol·L <sup>-1</sup>                     | 10 *10 *24 nm <sup>3</sup> | 124 / 186          | 175 / 183                         | 63000 |
| active-KOR/Dyn/N <sub>2</sub> O_0.6 | 880 / 0.6 mol·L <sup>-1</sup>                 | 10 *10 *24 nm <sup>3</sup> | 124 / 186          | 168 / 176                         | 61006 |

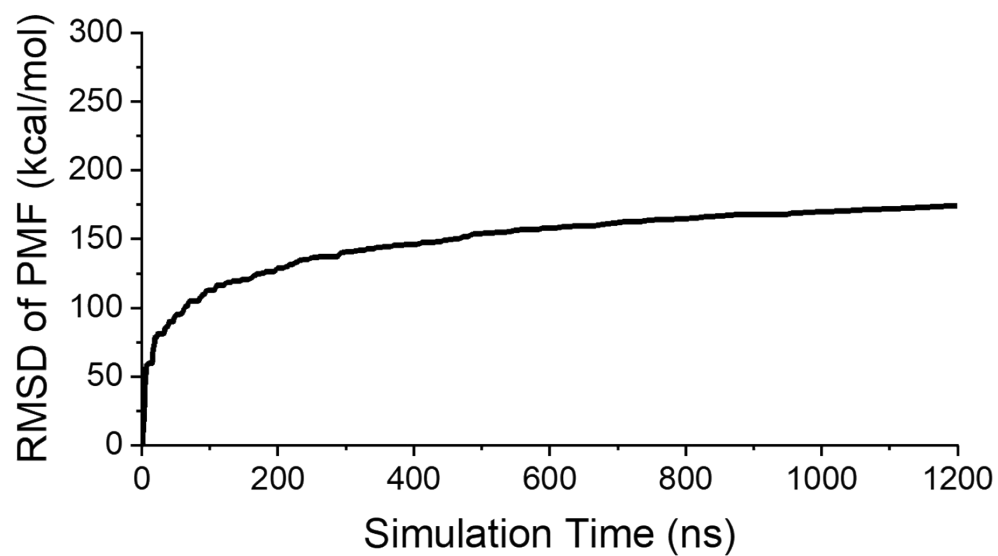

**Figure S1.** Time evolution of the RMSD between PMFs reconstructed at different simulation times, indicating stability of the free-energy profile at longer sampling times.

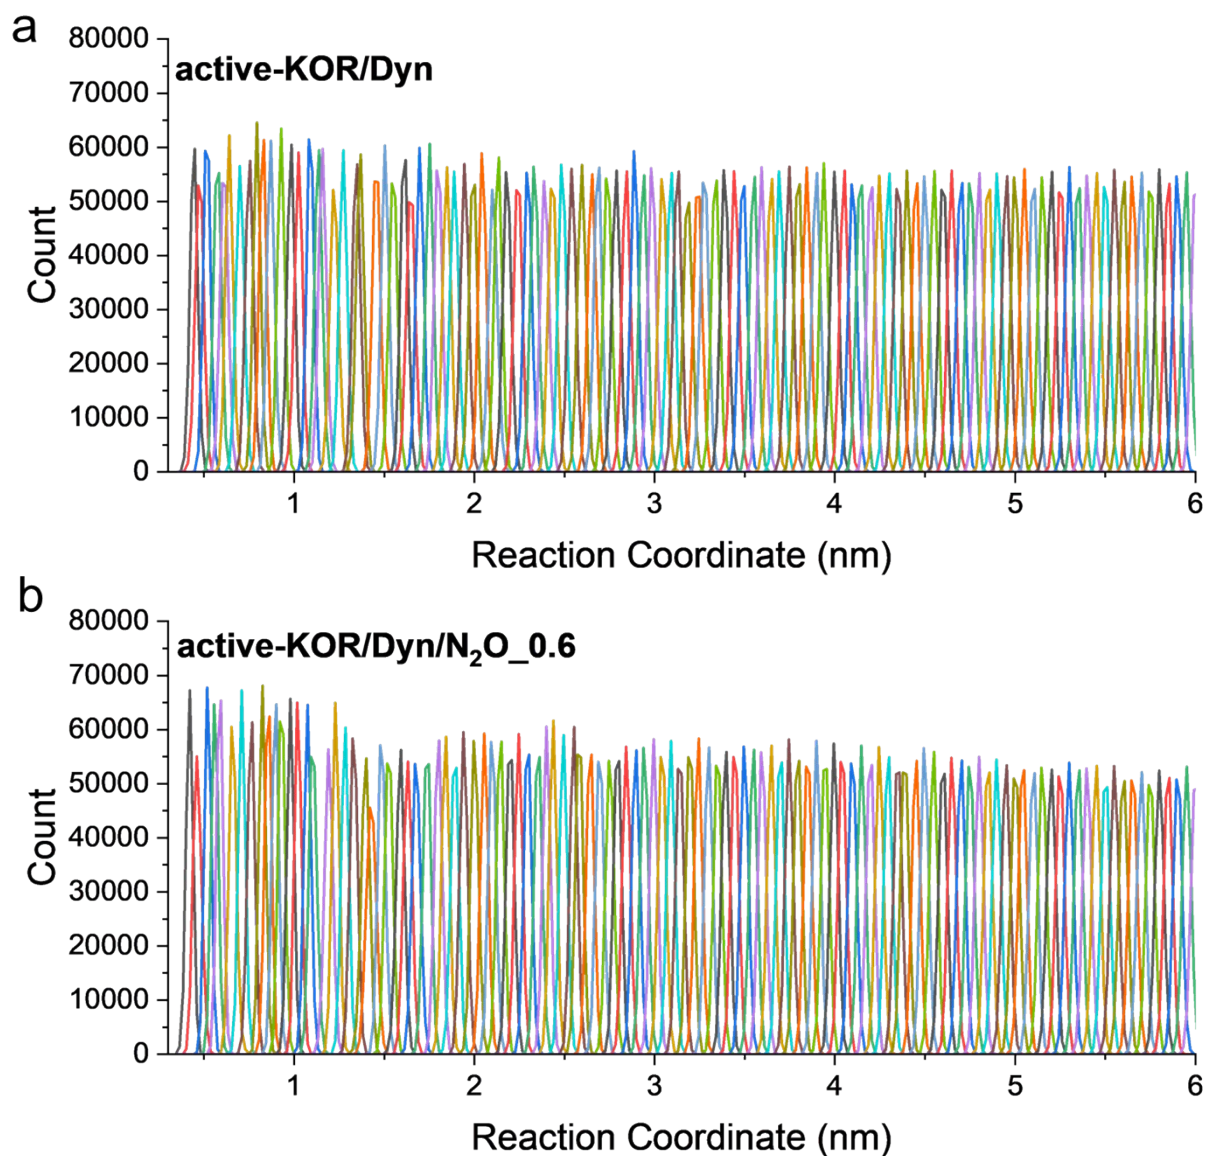

**Figure S2.** Histogram overlap analysis for umbrella sampling of Dyn binding to KOR. **(a, b)** Histograms of adjacent umbrella sampling windows along the reaction coordinate for Dyn binding from the extracellular region to the orthosteric site of KOR in the active-KOR/Dyn **(a)** and active-KOR/Dyn/N<sub>2</sub>O\_0.6 **(b)** systems. A total of 113 umbrella windows were used, and the sufficient overlap between neighboring windows confirms adequate sampling and reliable PMF.

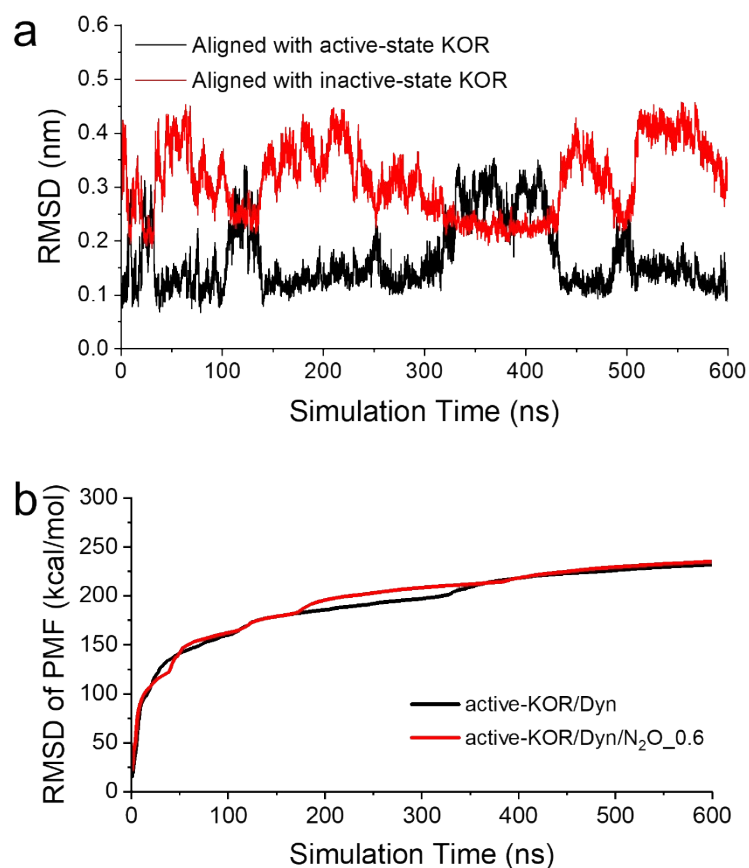

**Figure S3.** (a) RMSD of KOR Ca atoms relative to the active-state and inactive-state experimental KOR structures in the active-KOR/Dyn metadynamics simulation. (b) Time evolution of the RMSD of the PMF for the KOR inactive-to-active transition in the active-KOR/Dyn (black) and active-KOR/Dyn/N<sub>2</sub>O\_0.6 (red) systems, indicating stability of the free-energy profiles over extended sampling times.

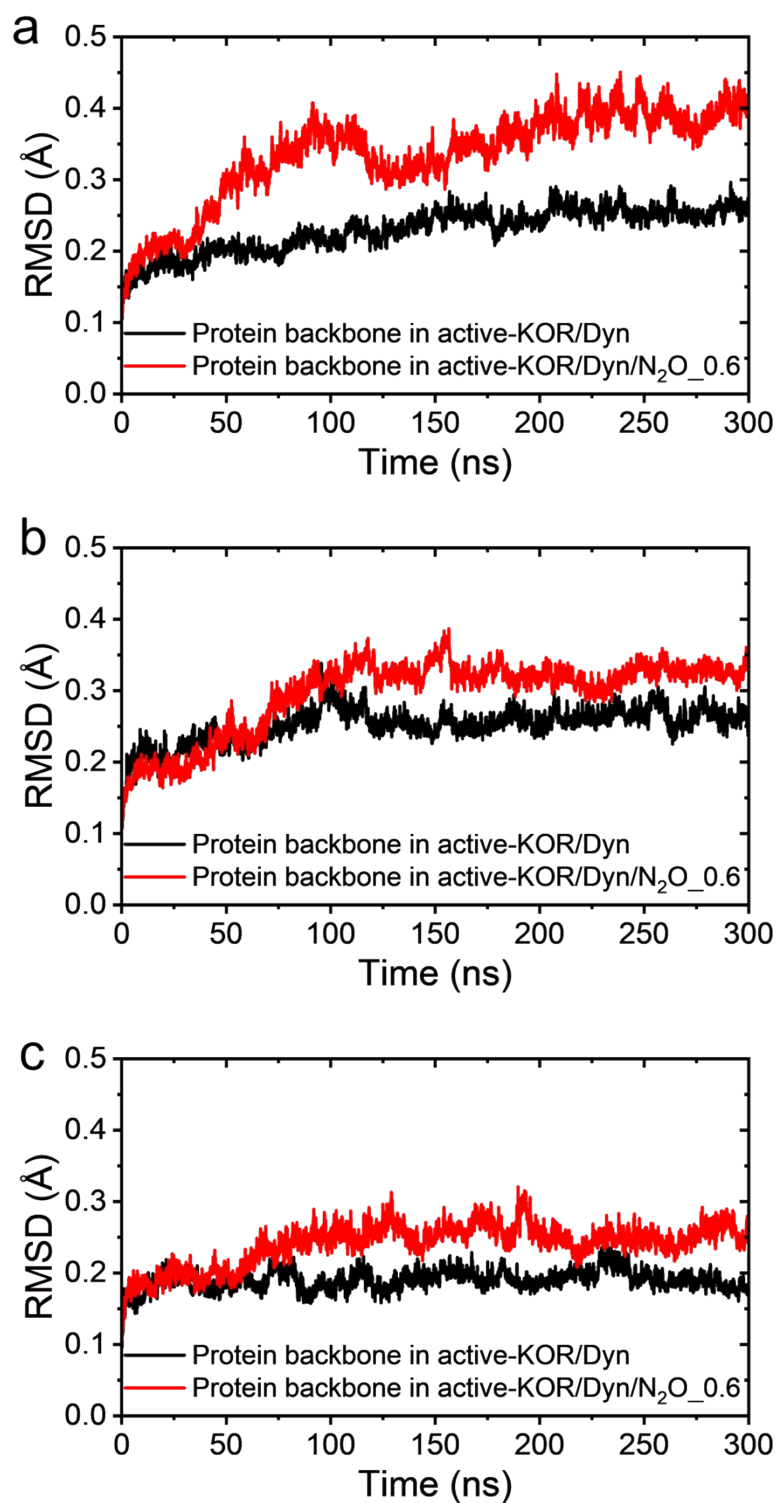

**Figure S4.** Structural stability of KOR during MD simulations in the control and N<sub>2</sub>O-containing simulations. (a–c) Time evolution of KOR backbone RMSDs from three independent replicate simulations of the active-KOR/Dyn (black) and active-KOR/Dyn/N<sub>2</sub>O\_0.6 (red) systems.
